# Supplementary material for: A molecular colour sensor for monosaccharides
Source: Royal Society of Chemistry journal article supplement (doi:10.1039/a909204h), 2000-01-01
Supplement: a909204h.doc [file a909204h.doc]

# **Supplementary data**

# **A molecular colour sensor for monosaccharides**

# **Christopher J Ward,*a* Prakash Patel,*b* Peter R Ashton*a* and Tony D James**a***

*a The University of Birmingham, School of Chemistry, Edgbaston, Birmingham, UK B15 2TT. E-mail: tdjames@chemistry.bham.ac.uk*

*b AVECIA Limited, Hexagon House, PO Box 42, Blackley Manchester, UK M9 8ZS*


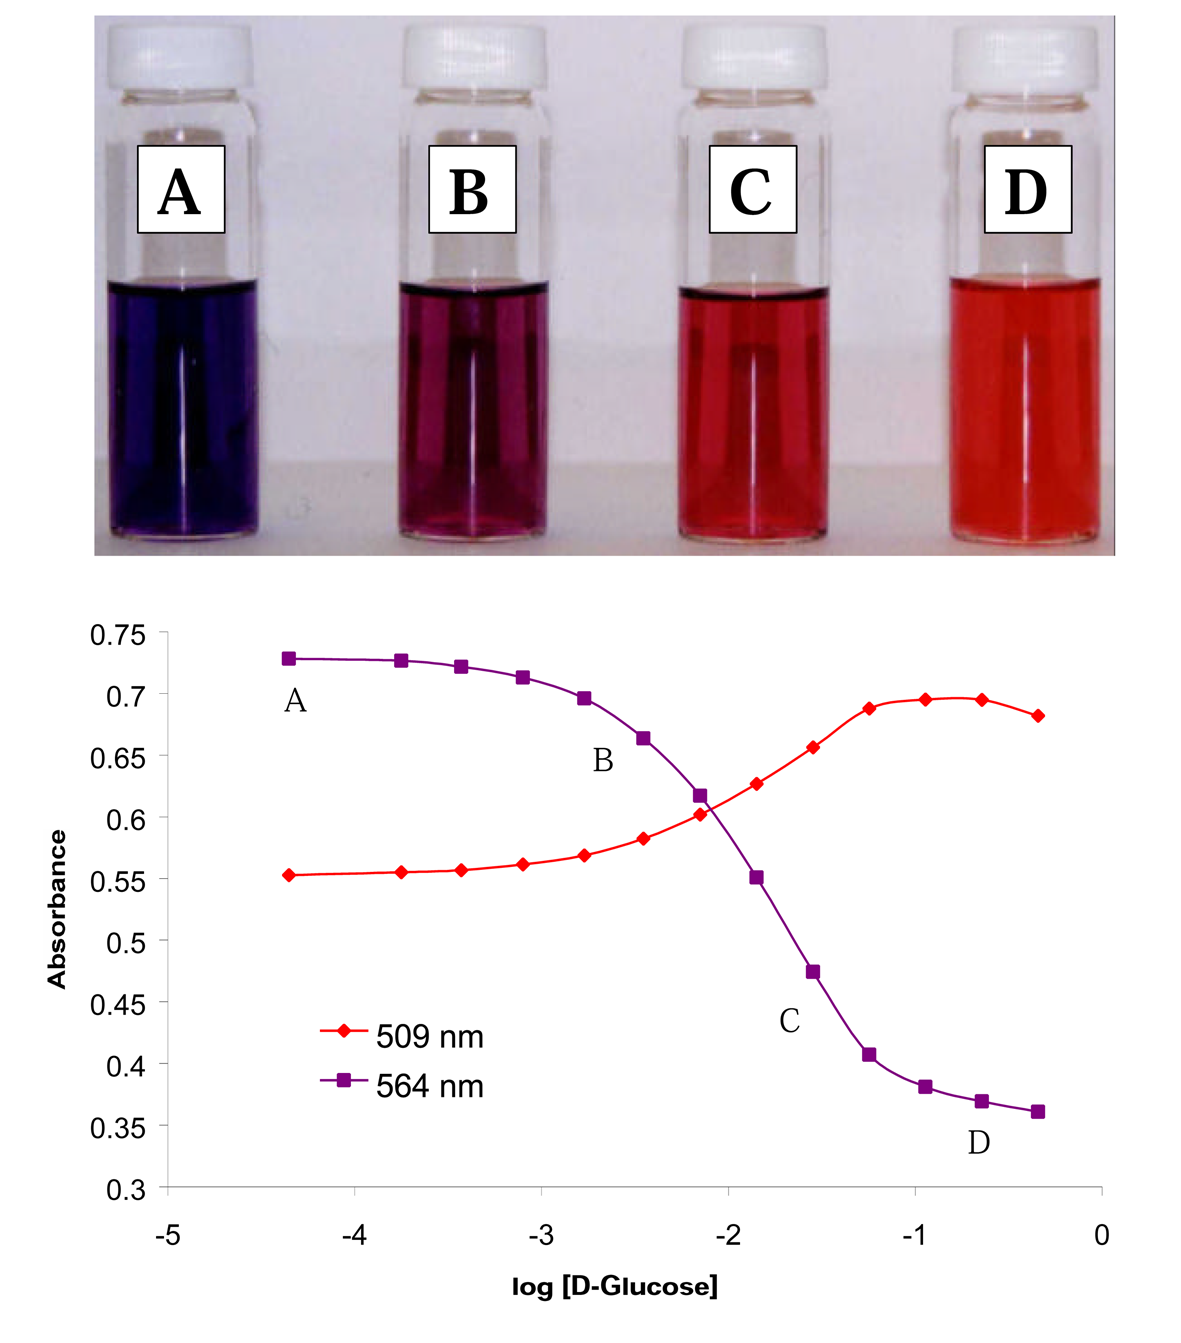


**Fig. S1** (Top) Colour changes upon addition of d-glucose to dye molecule **2** (5.66 × 10–5 mol dm–3) in a 0.05 mol dm–3 NaCl MeOH–H2O (1:2) buffer: (A) with no saccharide, (B) with 0.339 × 10–2 mol dm–3 d-glucose, (C) with 1.66 × 10–2 mol dm–3 d-glucose and (D) with 22.7 × 10–2 mol dm–3 d-glucose. (Bottom) Plot of absorption *vs*. log concentration of d-glucose for dye molecule **2** at pH 11.32.
